# Supplementary material for: BILFF: All-Atom Force Field for Modeling Triazolium- and Benzoate-Based Ionic Liquids
Source: MDPI journal article supplement (doi:10.3390/molecules28227592), 2023-11-14
Supplement: s1 [file s1]

# BILFF: All-Atom Force Field for Modeling Triazolium- and Benzoate-Based Ionic Liquids

## Supporting Information

Eliane Roos <sup>1</sup>, Daniel Sebastiani <sup>1</sup> and Martin Brehm <sup>1,2, \*</sup>

<sup>1</sup> *Institut für Chemie—Theoretische Chemie, Martin-Luther-Universität Halle-Wittenberg, Von-Danckelmann-Platz 4, 06120 Halle (Saale), Germany; eliane.roos@gmx.de (E.R.); daniel.sebastiani@chemie.uni-halle.de (D.S.)*

<sup>2</sup> *Department Chemie, Universität Paderborn, Warburger Straße 100, 33098 Paderborn, Germany*

\* Correspondence: martin\_brehm@gmx.de

# 1 Force Field Parameters

This section presents the optimized force field parameters for [EMTr]<sup>+</sup> and [OBz]<sup>−</sup> in anhydrous and aqueous [EMTr][OAc], [EMIm][OBz], and [EMTr][OBz], comparing them to the adapted literature force field.<sup>1–3</sup>

Table S1 presents the non-bonded interactions while the bonded interactions are shown in Table S2–S4. The force constants (*see Tab. S2 and S3*) and torsion parameters (*see Tab. S4*) do not include the factor 1/2. The 1–2 and 1–3 interactions were not taken into account while the 1–4 interactions were scaled with  $f_{ij} = 0.5$ . The Lennard–Jones interactions were calculated using geometric mixing rules. The PPPM long-range Coulomb solver implemented in LAMMPS<sup>4</sup> was used for Coulomb interactions. The coulomb and Lennard–Jones interactions were truncated at a cutoff radius of 800 pm. The force field BILFF<sup>5</sup> was applied for [EMIm]<sup>+</sup> and [OAc]<sup>−</sup> while for water, TIP4P–EW<sup>6</sup> (with fixed bonds and angles) was used without any modifications. The ions were assigned a total charge of  $\pm 0.82$ .

To optimize the force field parameters for [EMTr]<sup>+</sup>, we utilized BILFF<sup>5,7</sup> as a starting point. The Lennard–Jones parameters and force constants for [OBz]<sup>−</sup> were adapted from OPLS–AA,<sup>1–3</sup> while the partial charges were obtained using the restrained electrostatic potential (RESP) methodology based on quantum chemical calculations. Furthermore, the reference bond length was determined by geometry optimization. For [EMTr]<sup>+</sup> the Lennard–Jones parameter were adapted of [EMIm]<sup>+</sup> from BILFF,<sup>5</sup> while the reference bond length and angle of atom type NR was determined by a geometry optimization. The used starting force field parameters are listed in Tab. S–2–5 in comparison to the new optimized parameters.

Table S1: Comparison of the atomic partial charges  $q$  and Lennard–Jones parameter  $\sigma$  and  $\epsilon$  of [EMTr]<sup>+</sup> and [OBz]<sup>−</sup> in BILFF and the adapted literature force field.<sup>1–3,5,8–10</sup>

| Atom Type | BILFF               |                            |                                      | Literature (adapted) <sup>1–3,5,8–10</sup> |                            |                                      |
|-----------|---------------------|----------------------------|--------------------------------------|--------------------------------------------|----------------------------|--------------------------------------|
|           | $q$<br>/ $e$        | $\sigma$<br>/ $\text{\AA}$ | $\epsilon$<br>/ $\text{kJ mol}^{-1}$ | $q$<br>/ $e$                               | $\sigma$<br>/ $\text{\AA}$ | $\epsilon$<br>/ $\text{kJ mol}^{-1}$ |
|           | [EMTr] <sup>+</sup> |                            |                                      |                                            |                            |                                      |
| C1        | −0.187              | 3.34                       | 0.276                                | −0.147                                     | 3.34                       | 0.276                                |
| CE        | −0.054              | 3.34                       | 0.276                                | −0.042                                     | 3.34                       | 0.276                                |
| CW        | −0.144              | 3.38                       | 0.293                                | −0.133                                     | 3.38                       | 0.293                                |
| HCW       | 0.191               | 1.48                       | 0.126                                | 0.150                                      | 1.54                       | 0.126                                |
| HC        | 0.070               | 2.38                       | 0.126                                | 0.055                                      | 2.38                       | 0.126                                |
| H1        | 0.148               | 2.38                       | 0.126                                | 0.116                                      | 2.38                       | 0.126                                |
| NR        | −0.204              | 3.10                       | 0.711                                | −0.160                                     | 3.10                       | 0.711                                |
| NA        | 0.204               | 3.10                       | 0.711                                | 0.160                                      | 3.10                       | 0.711                                |
|           | [OBz] <sup>−</sup>  |                            |                                      |                                            |                            |                                      |
| C1        | 0.005               | 3.70                       | 0.2929                               | 0.006                                      | 3.55                       | 0.2929                               |
| C2        | −0.118              | 3.70                       | 0.2929                               | −0.142                                     | 3.55                       | 0.2929                               |
| C3        | −0.121              | 3.70                       | 0.2929                               | −0.025                                     | 3.55                       | 0.2929                               |
| C4        | −0.299              | 3.70                       | 0.2929                               | −0.241                                     | 3.55                       | 0.2929                               |
| CO        | 0.398               | 3.90                       | 0.4393                               | 0.371                                      | 3.75                       | 0.4393                               |
| H2        | 0.070               | 2.42                       | 0.1255                               | 0.084                                      | 2.42                       | 0.1255                               |
| H3        | 0.157               | 2.42                       | 0.1255                               | 0.069                                      | 2.42                       | 0.1255                               |
| H4        | 0.200               | 2.42                       | 0.1255                               | 0.120                                      | 2.42                       | 0.1255                               |
| O2        | −0.550              | 2.80                       | 0.8786                               | −0.524                                     | 2.96                       | 0.8786                               |

Table S2: Comparison of the bond equilibrium lengths  $l_0$  and force constants  $k_1$  of  $[\text{EMTr}]^+$  and  $[\text{OBz}]^-$  in BILFF and the adapted literature force field.<sup>1-3,5,8-10</sup>

| Bond                | BILFF        |                                                 | Literature (adapted) <sup>1-3,5,8-10</sup> |                                                 |
|---------------------|--------------|-------------------------------------------------|--------------------------------------------|-------------------------------------------------|
|                     | $l_0$<br>/ Å | $k_1$<br>/ kJ mol <sup>-1</sup> Å <sup>-2</sup> | $l_0$<br>/ Å                               | $k_1$<br>/ kJ mol <sup>-1</sup> Å <sup>-2</sup> |
| [EMTr] <sup>+</sup> |              |                                                 |                                            |                                                 |
| NA-NR               | 1.344        | 3199.2                                          | 1.340                                      | 3992.0                                          |
| CW-HA               | 1.088        | 2633.8                                          | 1.085                                      | 2943.0                                          |
| CW-NA               | 1.375        | 3108.7                                          | 1.403                                      | 2775.0                                          |
| CW-CW               | 1.386        | 3773.2                                          | 1.374                                      | 4019.0                                          |
| NA-CT               | 1.488        | 2046.3                                          | 1.485                                      | 2078.0                                          |
| HC-CT               | 1.099        | 2679.4                                          | 1.099                                      | 3013.0                                          |
| CT-CT               | 1.533        | 2125.5                                          | 1.532                                      | 2097.0                                          |
| [OBz] <sup>-</sup>  |              |                                                 |                                            |                                                 |
| CA-CA               | 1.387        | 3274.1                                          | 1.400                                      | 1962.3                                          |
| CA-HA               | 1.088        | 2707.4                                          | 1.084                                      | 1535.5                                          |
| CA-CO               | 1.504        | 1906.9                                          | 1.529                                      | 1673.6                                          |
| CO-O2               | 1.282        | 4273.1                                          | 1.252                                      | 2744.7                                          |

Table S3: Comparison of the angle equilibrium values  $\theta_0$  and force constants  $k_\theta$  of  $[\text{EMTr}]^+$  and  $[\text{OBz}]^-$  in BILFF and the adapted literature force field.<sup>1-3,5,8-10</sup>

| Angle               | BILFF               |                                                        | Literature (adapted) <sup>1-3,5,8-10</sup> |                                                        |
|---------------------|---------------------|--------------------------------------------------------|--------------------------------------------|--------------------------------------------------------|
|                     | $\theta_0$<br>/ Deg | $k_\theta$<br>/ kJ mol <sup>-1</sup> rad <sup>-2</sup> | $\theta_0$<br>/ Deg                        | $k_\theta$<br>/ kJ mol <sup>-1</sup> rad <sup>-2</sup> |
| [EMTr] <sup>+</sup> |                     |                                                        |                                            |                                                        |
| CW-NA-NR            | 112.1               | 568.7                                                  | 112.1                                      | 585.8                                                  |
| NR-NA-CT            | 118.6               | 396.5                                                  | 118.6                                      | 585.8                                                  |
| NA-NR-NA            | 104.4               | 610.1                                                  | 104.4                                      | 585.8                                                  |
| NA-CT-CT            | 110.9               | 361.2                                                  | 110.9                                      | 532.7                                                  |
| NA-CW-CW            | 107.0               | 579.7                                                  | 107.0                                      | 805.7                                                  |
| NA-CW-HA            | 120.8               | 200.9                                                  | 120.8                                      | 263.0                                                  |
| CW-CW-HA            | 131.7               | 190.5                                                  | 131.7                                      | 236.7                                                  |
| NA-CT-HC            | 107.2               | 375.9                                                  | 107.2                                      | 411.7                                                  |
| CT-CT-HC            | 111.4               | 296.2                                                  | 111.4                                      | 338.6                                                  |
| HC-CT-HC            | 109.2               | 226.5                                                  | 109.2                                      | 308.0                                                  |
| CW-NA-CT            | 125.2               | 242.9                                                  | 125.2                                      | 367.8                                                  |
| [OBz] <sup>-</sup>  |                     |                                                        |                                            |                                                        |
| CA-CA-CA            | 120.0               | 446.0                                                  | 120.0                                      | 263.6                                                  |
| CA-CA-HA            | 120.0               | 258.1                                                  | 120.0                                      | 146.4                                                  |
| CA-CA-CO            | 120.0               | 397.6                                                  | 120.0                                      | 355.6                                                  |
| CA-CO-O2            | 117.0               | 550.2                                                  | 117.0                                      | 292.9                                                  |
| O2-CO-O2            | 126.0               | 735.9                                                  | 126.0                                      | 334.7                                                  |

Table S4: Comparison of the torsional coefficients  $V_n$  of  $[\text{EMTr}]^+$  and  $[\text{OBz}]^-$  in BILFF and the adapted literature force field.<sup>1-3,5,8-10</sup>

| Torsion Angle     | BILFF                           |                                 |                                 |                                 | Literature (adapted) <sup>1-3,5,8-10</sup> |                                 |                                 |                                 |
|-------------------|---------------------------------|---------------------------------|---------------------------------|---------------------------------|--------------------------------------------|---------------------------------|---------------------------------|---------------------------------|
|                   | $V_1$<br>/ kJ mol <sup>-1</sup> | $V_2$<br>/ kJ mol <sup>-1</sup> | $V_3$<br>/ kJ mol <sup>-1</sup> | $V_4$<br>/ kJ mol <sup>-1</sup> | $V_1$<br>/ kJ mol <sup>-1</sup>            | $V_2$<br>/ kJ mol <sup>-1</sup> | $V_3$<br>/ kJ mol <sup>-1</sup> | $V_4$<br>/ kJ mol <sup>-1</sup> |
| $[\text{EMTr}]^+$ |                                 |                                 |                                 |                                 |                                            |                                 |                                 |                                 |
| CW-NA-NR-NA       | 0.0000                          | 19.4600                         | 0.0000                          | 0.0000                          | 0.0000                                     | 19.4600                         | 0.0000                          | 0.0000                          |
| CT-NA-NR-NA       | 0.0000                          | 19.4600                         | 0.0000                          | 0.0000                          | 0.0000                                     | 19.4600                         | 0.0000                          | 0.0000                          |
| NR-NA-CW-CW       | 0.0000                          | 12.5500                         | 0.0000                          | 0.0000                          | 0.0000                                     | 12.5500                         | 0.0000                          | 0.0000                          |
| NR-NA-CW-HA       | 0.0000                          | 12.5500                         | 0.0000                          | 0.0000                          | 0.0000                                     | 12.5500                         | 0.0000                          | 0.0000                          |
| NR-NA-CT-HC       | 0.0000                          | 0.0000                          | 0.0000                          | 0.0000                          | 0.0000                                     | 0.0000                          | 0.0000                          | 0.0000                          |
| NR-NA-CT-CT       | 0.1000                          | 1.0000                          | 0.1000                          | -0.3000                         | -5.2691                                    | 0.0000                          | 0.0000                          | 0.0000                          |
| CT-NA-CW-CW       | 0.0000                          | 12.5500                         | 0.0000                          | 0.0000                          | 0.0000                                     | 12.5500                         | 0.0000                          | 0.0000                          |
| CT-NA-CW-HA       | 0.0000                          | 12.5500                         | 0.0000                          | 0.0000                          | 0.0000                                     | 12.5500                         | 0.0000                          | 0.0000                          |
| NA-CW-CW-NA       | 0.0000                          | 65.0000                         | 0.0000                          | 0.0000                          | 0.0000                                     | 65.0000                         | 0.0000                          | 0.0000                          |
| NA-CW-CW-HA       | 0.0000                          | 44.9800                         | 0.0000                          | 0.0000                          | 0.0000                                     | 44.9800                         | 0.0000                          | 0.0000                          |
| HA-CW-CW-HA       | 0.0000                          | 30.0000                         | 0.0000                          | 0.0000                          | 0.0000                                     | 30.0000                         | 0.0000                          | 0.0000                          |
| CW-NA-CT-HC       | 0.1000                          | 0.2000                          | 0.0000                          | 0.0000                          | 0.0000                                     | 0.0000                          | 0.5190                          | 0.0000                          |
| CW-NA-CT-CT       | 0.4000                          | 1.0000                          | 0.0000                          | 0.2000                          | 14.3000                                    | -12.2000                        | -1.5900                         | 0.0000                          |
| NA-CT-CT-HC       | 0.0000                          | 0.0000                          | 0.3670                          | 0.0000                          | 0.0000                                     | 0.0000                          | 0.3670                          | 0.0000                          |
| HC-CT-CT-HC       | 0.0000                          | 0.0000                          | 1.2552                          | 0.0000                          | 0.0000                                     | 0.0000                          | 1.2552                          | 0.0000                          |
| $[\text{OBz}]^-$  |                                 |                                 |                                 |                                 |                                            |                                 |                                 |                                 |
| CA-CA-CA-CA       | 0.0000                          | 30.334                          | 0.0000                          | 0.0000                          | 0.0000                                     | 30.334                          | 0.0000                          | 0.0000                          |
| HA-CA-CA-CA       | 0.0000                          | 30.334                          | 0.0000                          | 0.0000                          | 0.0000                                     | 30.334                          | 0.0000                          | 0.0000                          |
| HA-CA-CA-CO       | 0.0000                          | 30.334                          | 0.0000                          | 0.0000                          | 0.0000                                     | 30.334                          | 0.0000                          | 0.0000                          |
| HA-CA-CA-HA       | 0.0000                          | 30.334                          | 0.0000                          | 0.0000                          | 0.0000                                     | 30.334                          | 0.0000                          | 0.0000                          |
| CA-CA-CA-CO       | 0.0000                          | 30.334                          | 0.0000                          | 0.0000                          | 0.0000                                     | 30.334                          | 0.0000                          | 0.0000                          |
| CA-CA-CO-O2       | 0.0000                          | 8.000                           | 0.0000                          | 0.0000                          | 0.0000                                     | 8.000                           | 0.0000                          | 0.0000                          |

## 2 Additional Radial Distribution Functions

To further characterize the force field and describe the underlying molecular systems, additional radial distribution functions (RDFs) are shown below.

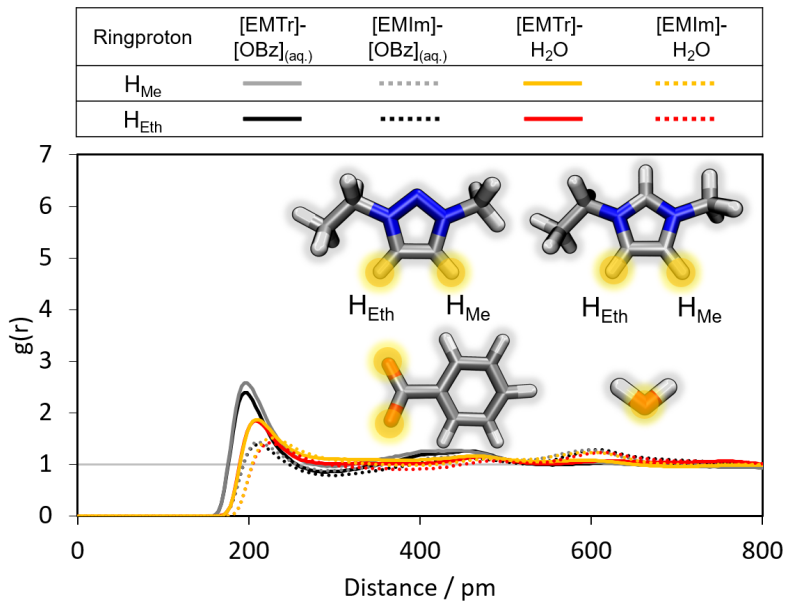

Figure S1: Comparison of the RDFs of the hydrogen bond between the marked oxygen atoms of [OBz]<sup>−</sup>/water and the ring protons of [EMIm]<sup>+</sup>/[EMTr]<sup>+</sup> calculated from force field MD simulations of [EMTr][OBz] and [EMIm][OBz] using BILFF.

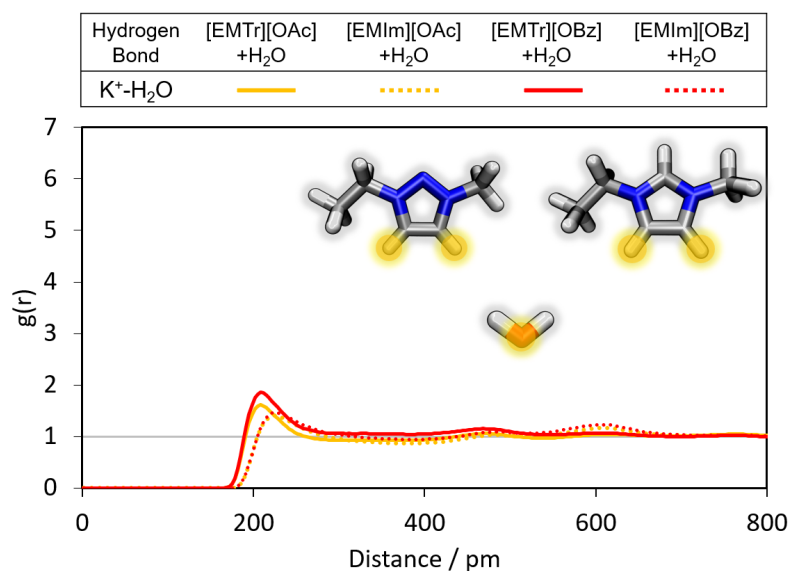

Figure S2: Comparison of the RDFs of the hydrogen bond between the marked oxygen atom of water and the ring protons of [EMTr]<sup>+</sup> and [EMIm]<sup>+</sup> calculated from force field MD simulations using BILFF in all four ILs.

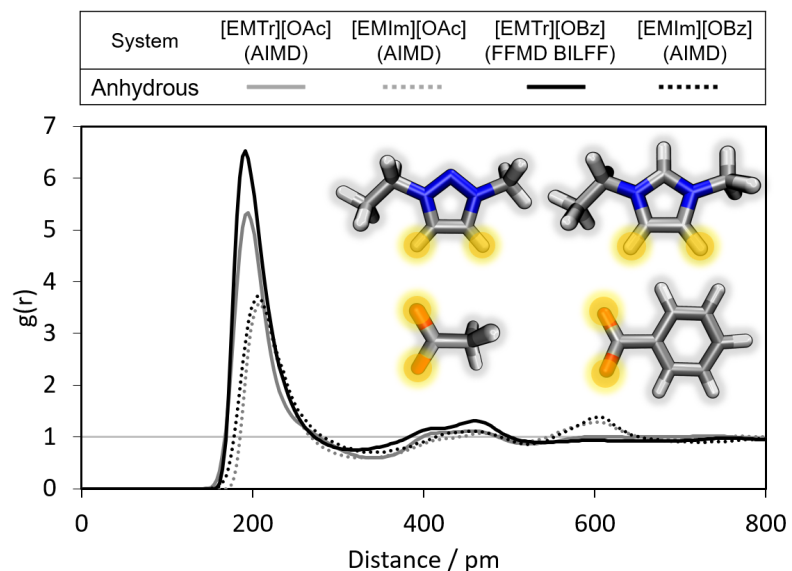

Figure S3: Comparison of the RDFs of the hydrogen bond between the marked oxygen atoms of [OBz]<sup>−</sup> as well as [OAc]<sup>−</sup> and the ring protons of [EMIm]<sup>+</sup> and [EMTr]<sup>+</sup> calculated from the reference AIMDs. For a comparison of the results with anhydrous [EMTr][OBz] the results from the force field MD simulation (FFMD) using BILFF are shown. The RDFs are averaged over the marked ring protons.

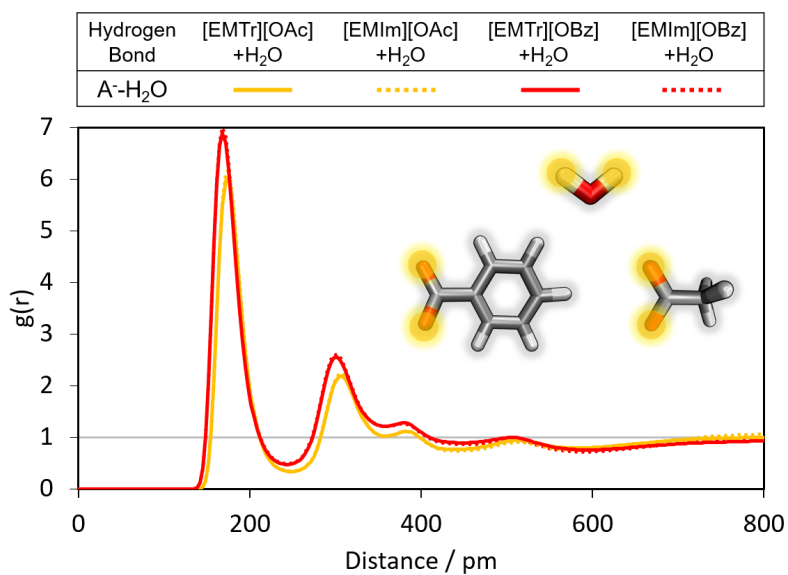

Figure S4: Comparison of the RDFs of the hydrogen bond between the marked oxygen atoms of  $[\text{OBz}]^-/[\text{OAc}]^-$  and the protons of water calculated from force field MD simulations using BILFF in all four ILs.

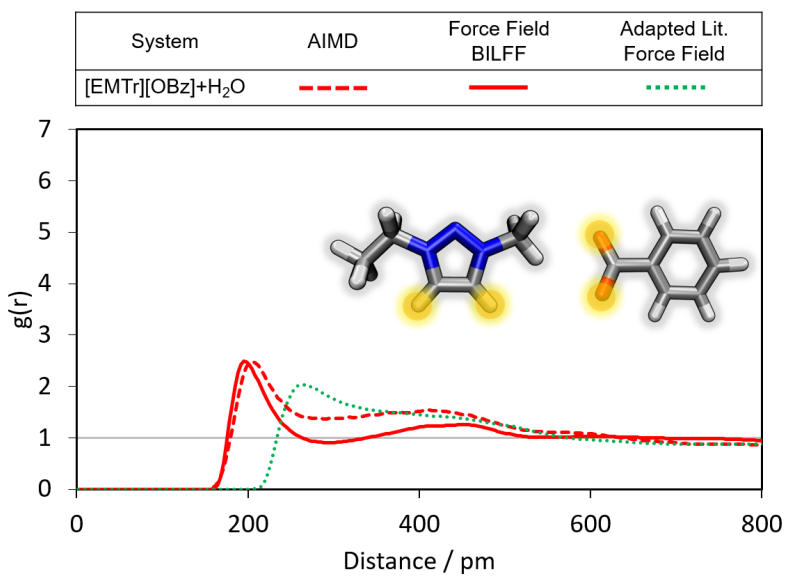

Figure S5: Comparison of the RDFs of the hydrogen bond between the marked oxygen atoms of  $[\text{OBz}]^-$  and the ring protons of  $[\text{EMTr}]^+$  calculated from a reference AIMD and force field MD simulations using adapted literature force field parameter<sup>8–10</sup> and BILFF. The RDFs are averaged over both ring protons.

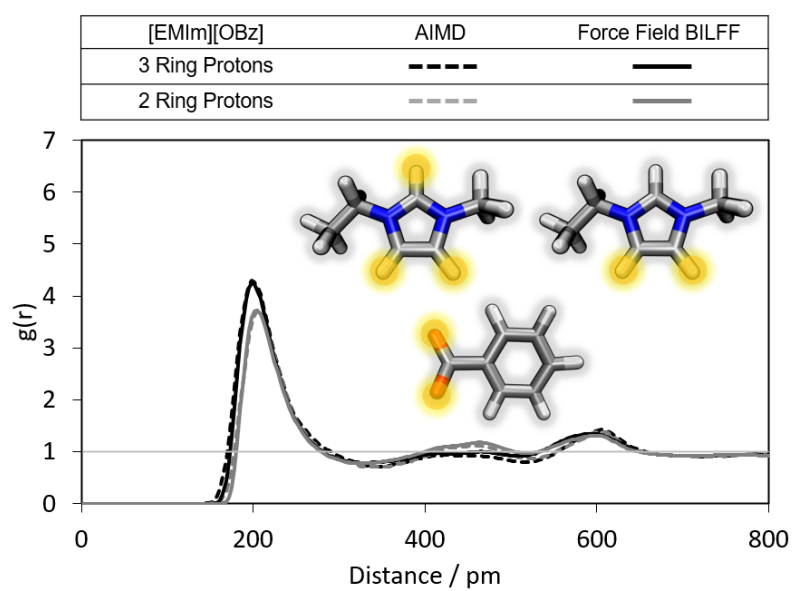

Figure S6: Comparison of the RDFs of the hydrogen bond between the marked oxygen atoms of  $[\text{OBz}]^-$  and the two/three ring protons of  $[\text{EMIm}]^+$  calculated from a reference AIMD and force field MD simulations using BILFF. The RDFs are averaged over the marked ring protons.



### 3 Additional Distance–Angle Combined Distribution Functions

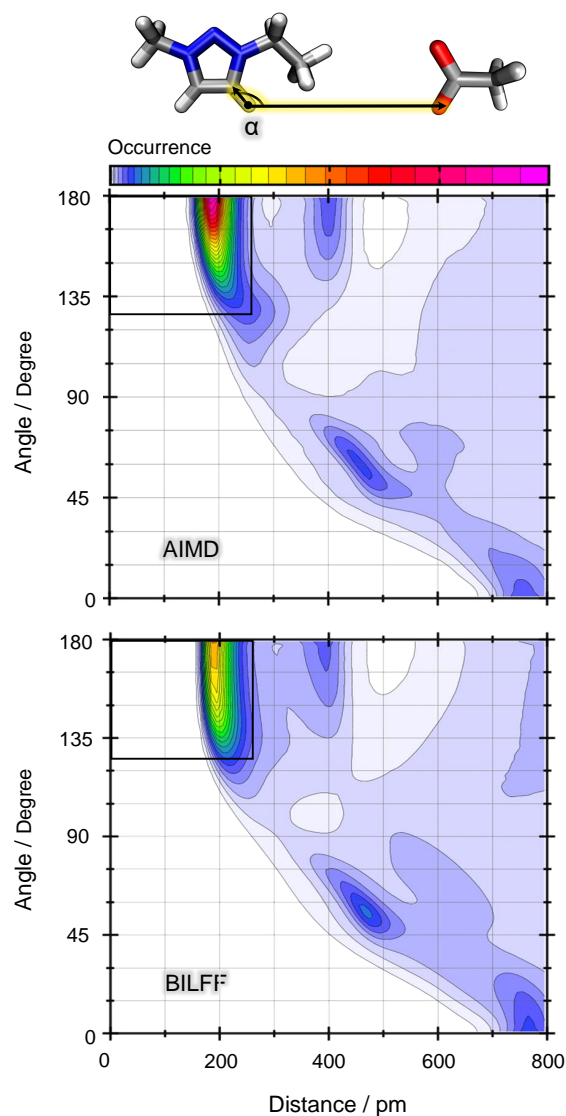

Figure S7: Distance–angle distribution function between an example ring proton of  $[\text{EMTr}]^+$  and the oxygen atoms of  $[\text{OAc}]^-$  in pure  $[\text{EMTr}][\text{OAc}]$  as a result of a reference AIMD (top) and a force field MD simulations with our new force field (bottom). The black rectangle demonstrates the geometric criterion for calculating the lifetime of the hydrogen bonds.

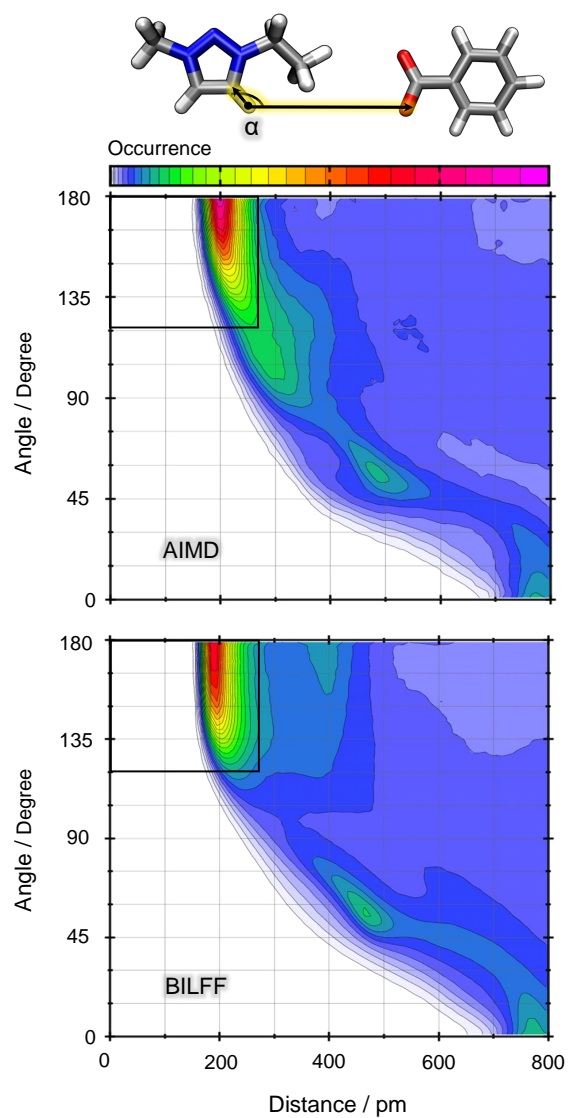

Figure S8: Distance-angle distribution function between an example ring proton of  $[\text{EMTr}]^+$  and the oxygen atoms of  $[\text{OBz}]^-$  in aqueous  $[\text{EMTr}][\text{OBz}]$  as a result of a reference AIMD (top) and a force field MD simulations with our new force field (bottom). The black rectangle demonstrates the geometric criterion for calculating the lifetime of the hydrogen bonds.

## 4 Additional Spatial Distribution Function

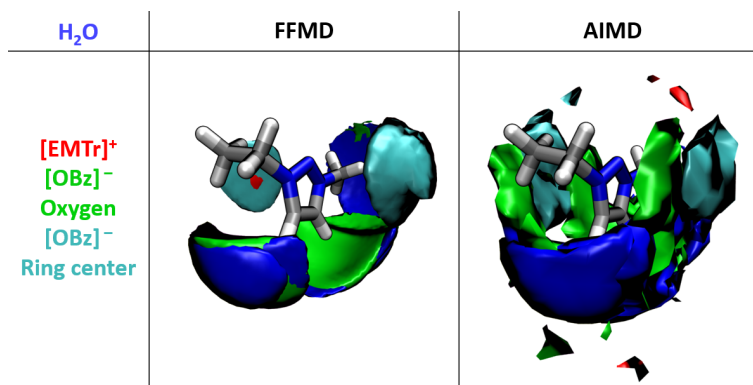

Figure S9: Spatial distribution function of the arrangement of molecules in aqueous [EMTr][OBz] around the cation with the protons and oxygen atoms of water (blue,  $26 \text{ nm}^{-3}$ ) and the oxygen atom of the anion (green,  $7 \text{ nm}^{-3}$ ) as well as the ring center of the cation (red,  $7 \text{ nm}^{-3}$ ) and anion (cyan,  $10 \text{ nm}^{-3}$ ) resulted from a force field MD simulation using BILFF and the reference AIMD simulation.

## 5 Sankey Diagrams

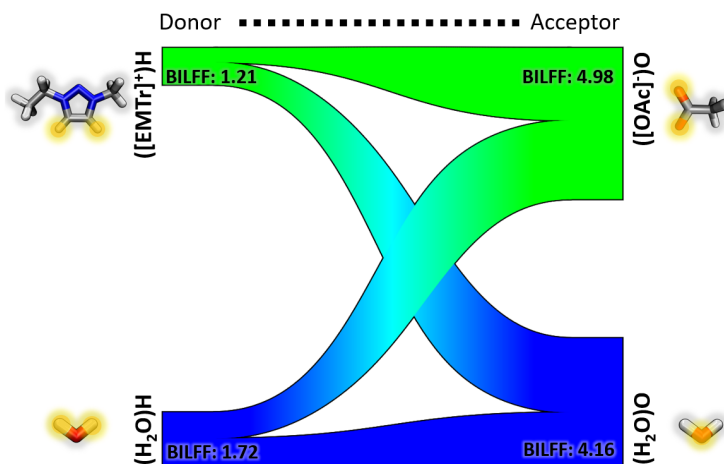

Figure S10: Sankey diagram of aqueous [EMTr][OAc] calculated from a force field MD simulation using BILFF.

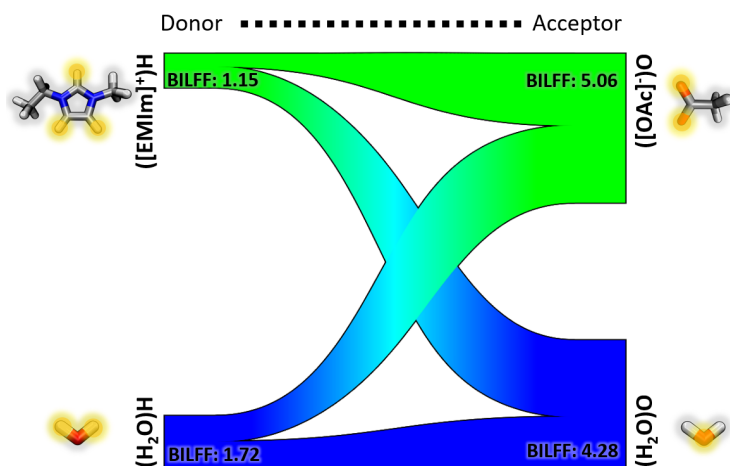

Figure S11: Sankey diagram of aqueous [EMIm][OAc] calculated from a force field MD simulation using BILFF.

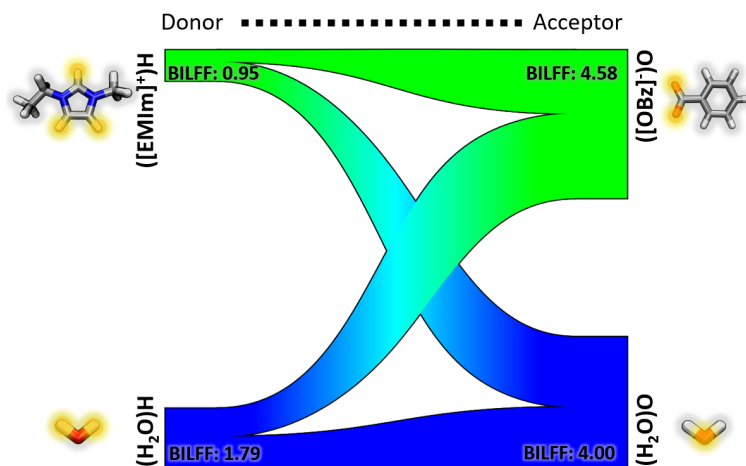

Figure S12: Sankey diagram of aqueous [EMIm][OBz] calculated from a force field MD simulation using BILFF.

## 6 Lifetime of Additional Hydrogen Bonds

Table S5: Angle and distance criteria of the different hydrogen bonds for the calculation of the hydrogen bond lifetime.

| Hydrogen Bond                 | Atom Distance<br>/ pm | Angle<br>/ ° |
|-------------------------------|-----------------------|--------------|
| ([EMTr])H–O([OAc])            | 0–260                 | 125–180      |
| ([EMIm])H–O([OBz])            | 0–250                 | 125–180      |
| ([EMTr])H–O([OBz])            | 0–270                 | 122–180      |
| ([EMTr])H–O(H <sub>2</sub> O) | 0–260                 | 118–180      |
| (H <sub>2</sub> O)H–O([OBz])  | 0–230                 | 137–180      |
| ([EMIm])H–O([OAc])            | 0–260                 | 112–180      |
| ([EMIm])H–O(H <sub>2</sub> O) | 0–260                 | 120–180      |
| (H <sub>2</sub> O)H–O([OAc])  | 0–180                 | 165–180      |

Table S6: Overview of the lifetime  $\tau$  of the hydrogen bonds in all four systems comparing the results of the reference AIMD simulation and the force field MD simulation using BILFF at the given temperatures (C<sup>+</sup>=Cation, A<sup>−</sup>=Anion). (No AIMD simulations of anhydrous [EMTr][OBz] as well as [EMTr][OAc]/H<sub>2</sub>O and [EMIm][OBz]/H<sub>2</sub>O have been calculated, so no data are available for these.)

| Temp.                                                             | Intermittent          |                       | Continuous            |                       |
|-------------------------------------------------------------------|-----------------------|-----------------------|-----------------------|-----------------------|
| / K                                                               | $\tau$ (AIMD)<br>/ ps | $\tau$ (FFMD)<br>/ ps | $\tau$ (AIMD)<br>/ ps | $\tau$ (FFMD)<br>/ ps |
| [EMTr][OAc]                                                       |                       |                       |                       |                       |
| (C <sup>+</sup> )H <sub>Eth</sub> ...O(A <sup>−</sup> )<br>350 K  | 513.8                 | 556.6                 | 4.1                   | 4.3                   |
| (C <sup>+</sup> )H <sub>Me</sub> ...O(A <sup>−</sup> )<br>350 K   | 581.6                 | 394.5                 | 3.8                   | 3.9                   |
| [EMTr][OAc]/H <sub>2</sub> O                                      |                       |                       |                       |                       |
| (C <sup>+</sup> )H <sub>Eth</sub> ...O(A <sup>−</sup> )<br>350 K  | –                     | 74.9                  | –                     | 1.9                   |
| (C <sup>+</sup> )H <sub>Me</sub> ...O(A <sup>−</sup> )<br>350 K   | –                     | 81.9                  | –                     | 1.8                   |
| (C <sup>+</sup> )H <sub>Eth</sub> ...O(H <sub>2</sub> O)<br>350 K | –                     | 24.9                  | –                     | 1.1                   |
| (C <sup>+</sup> )H <sub>Me</sub> ...O(H <sub>2</sub> O)<br>350 K  | –                     | 23.9                  | –                     | 1.0                   |
| [EMIm][OAc] <sup>a</sup>                                          |                       |                       |                       |                       |
| (C <sup>+</sup> )H <sub>Eth</sub> ...O(A <sup>−</sup> )<br>350 K  | 212.6                 | 250.3                 | 10.5                  | 10.0                  |
| (C <sup>+</sup> )H <sub>Me</sub> ...O(A <sup>−</sup> )<br>350 K   | 282.4                 | 260.7                 | 11.9                  | 11.5                  |
| [EMIm][OBz]                                                       |                       |                       |                       |                       |
| (C <sup>+</sup> )H <sub>Eth</sub> ...O(A <sup>−</sup> )<br>350 K  | 309.6                 | 750.1                 | 1.1                   | 1.5                   |
| (C <sup>+</sup> )H <sub>Me</sub> ...O(A <sup>−</sup> )<br>350 K   | 161.7                 | 657.3                 | 1.0                   | 1.4                   |

|                                                                   | [EMIm][OBz]/H <sub>2</sub> O |        |     |     |
|-------------------------------------------------------------------|------------------------------|--------|-----|-----|
| (C <sup>+</sup> )H <sub>Eth</sub> ...O(A <sup>-</sup> )<br>350 K  | —                            | 71.8   | —   | 0.9 |
| (C <sup>+</sup> )H <sub>Me</sub> ...O(A <sup>-</sup> )<br>350 K   | —                            | 69.1   | —   | 0.8 |
| (C <sup>+</sup> )H <sub>Eth</sub> ...O(H <sub>2</sub> O)<br>350 K | —                            | 25.2   | —   | 0.6 |
| (C <sup>+</sup> )H <sub>Me</sub> ...O(H <sub>2</sub> O)<br>350 K  | —                            | 24.8   | —   | 0.6 |
|                                                                   | [EMTr][OBz]                  |        |     |     |
| (C <sup>+</sup> )H <sub>Eth</sub> ...O(A <sup>-</sup> )<br>350 K  | —                            | 1712.7 | —   | 6.7 |
| (C <sup>+</sup> )H <sub>Me</sub> ...O(A <sup>-</sup> )<br>350 K   | —                            | 2014.9 | —   | 5.8 |
|                                                                   | [EMTr][OBz]/H <sub>2</sub> O |        |     |     |
| (C <sup>+</sup> )H <sub>Eth</sub> ...O(A <sup>-</sup> )<br>350 K  | 80.7                         | 128.2  | 1.8 | 2.5 |
| 450 K                                                             | 25.8                         | 18.3   | 0.9 | 1.4 |
| 550 K                                                             | 10.9                         | 7.6    | 0.6 | 1.0 |
| (C <sup>+</sup> )H <sub>Me</sub> ...O(A <sup>-</sup> )<br>350 K   | 83.8                         | 134.5  | 1.4 | 2.4 |
| 450 K                                                             | 17.9                         | 9.2    | 0.7 | 1.3 |
| 550 K                                                             | 10.8                         | 7.8    | 0.6 | 1.0 |
| (C <sup>+</sup> )H <sub>Eth</sub> ...O(H <sub>2</sub> O)<br>350 K | 38.9                         | 33.0   | 0.7 | 1.1 |
| 450 K                                                             | 4.4                          | 4.6    | 0.4 | 0.7 |
| 550 K                                                             | —                            | 1.7    | 0.3 | 0.5 |
| (C <sup>+</sup> )H <sub>Me</sub> ...O(H <sub>2</sub> O)<br>350 K  | 22.7                         | 33.0   | 0.6 | 1.0 |
| 450 K                                                             | 4.7                          | 4.6    | 0.3 | 0.6 |
| 550 K                                                             | —                            | 1.8    | 0.3 | 0.5 |

<sup>a</sup> Calculated from the MD simulations of our already published article.<sup>5</sup>

## References

- [1] W. L. Jorgensen, D. S. Maxwell and J. Tirado-Rives, J. Am. Chem. Soc., 1996, **118**, 11225–11236.
- [2] J. W. Ponder and D. A. Case, Adv. Protein Chem., 2003, **66**, 27–85.
- [3] S. V. Sambasivarao and O. Acevedo, J. Chem. Theory Comput., 2009, **5**, 1038–1050.
- [4] S. Plimpton, J. Comp. Phys., 1995, **117**, 1–19.
- [5] E. Roos and M. Brehm, PCCP, 2021, **23**, 1242–1253.
- [6] H. W. Horn, W. C. Swope, J. W. Pitera, J. D. Madura, T. J. Dick, G. L. Hura and T. Head-Gordon, J. Chem. Phys., 2004, **120**, 9665–9678.
- [7] E. Roos, D. Sebastiani and M. Brehm, PCCP, 2023, **25**, 8755–8766.
- [8] J. N. Canongia Lopes, J. Deschamps and A. A. H. Pádua, J. Phys. Chem. B, 2004, **108**, 2038–2047.
- [9] J. N. Canongia Lopes and A. A. H. Pádua, J. Phys. Chem. B, 2006, **110**, 19586–19592.
- [10] J. N. Canongia Lopes and A. A. H. Pádua, Theor. Chem. Acc., 2012, **131**, 3330.
